# Supplementary material for: Circulating tumour DNA from the cerebrospinal fluid allows the characterisation and monitoring of medulloblastoma
Source: PubMed Central journal article supplement (PMC7591522; doi:10.1038/s41467-020-19175-0), 2020-10-27
Supplement: 41467_2020_19175_MOESM1_ESM.pdf [file 41467_2020_19175_MOESM1_ESM.pdf]

Circulating tumour DNA from the cerebrospinal fluid  
allows the characterisation and monitoring of medulloblastoma

Escudero *et al.*,

## SUPPLEMENTARY INFORMATION

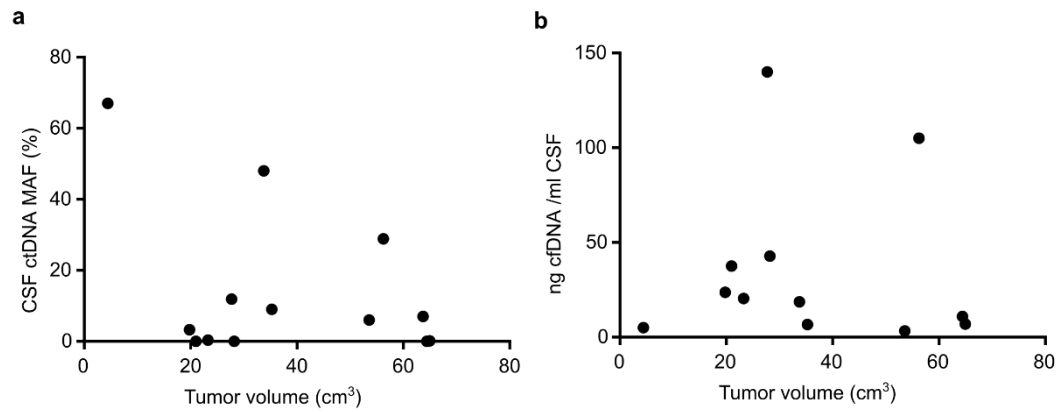

**Supplementary Figure 1** | Correlation of tumor volume (cm<sup>3</sup>) with (a) CSF ctDNA VAF (%) and (b) cfDNA (ng/ml). CSF samples were collected before the surgical resection for the 13 patients. CSF ctDNA MAF (%) analysed by ddPCR as previously shown in Fig. 2a for the 13 patients. The concentrations of CSF cfDNA (ng/ml) were calculated from 12 patients. No correlations were identified (Spearman  $r$ , two-tailed,  $p=0.5634$  and  $p= 0.5731$  respectively).

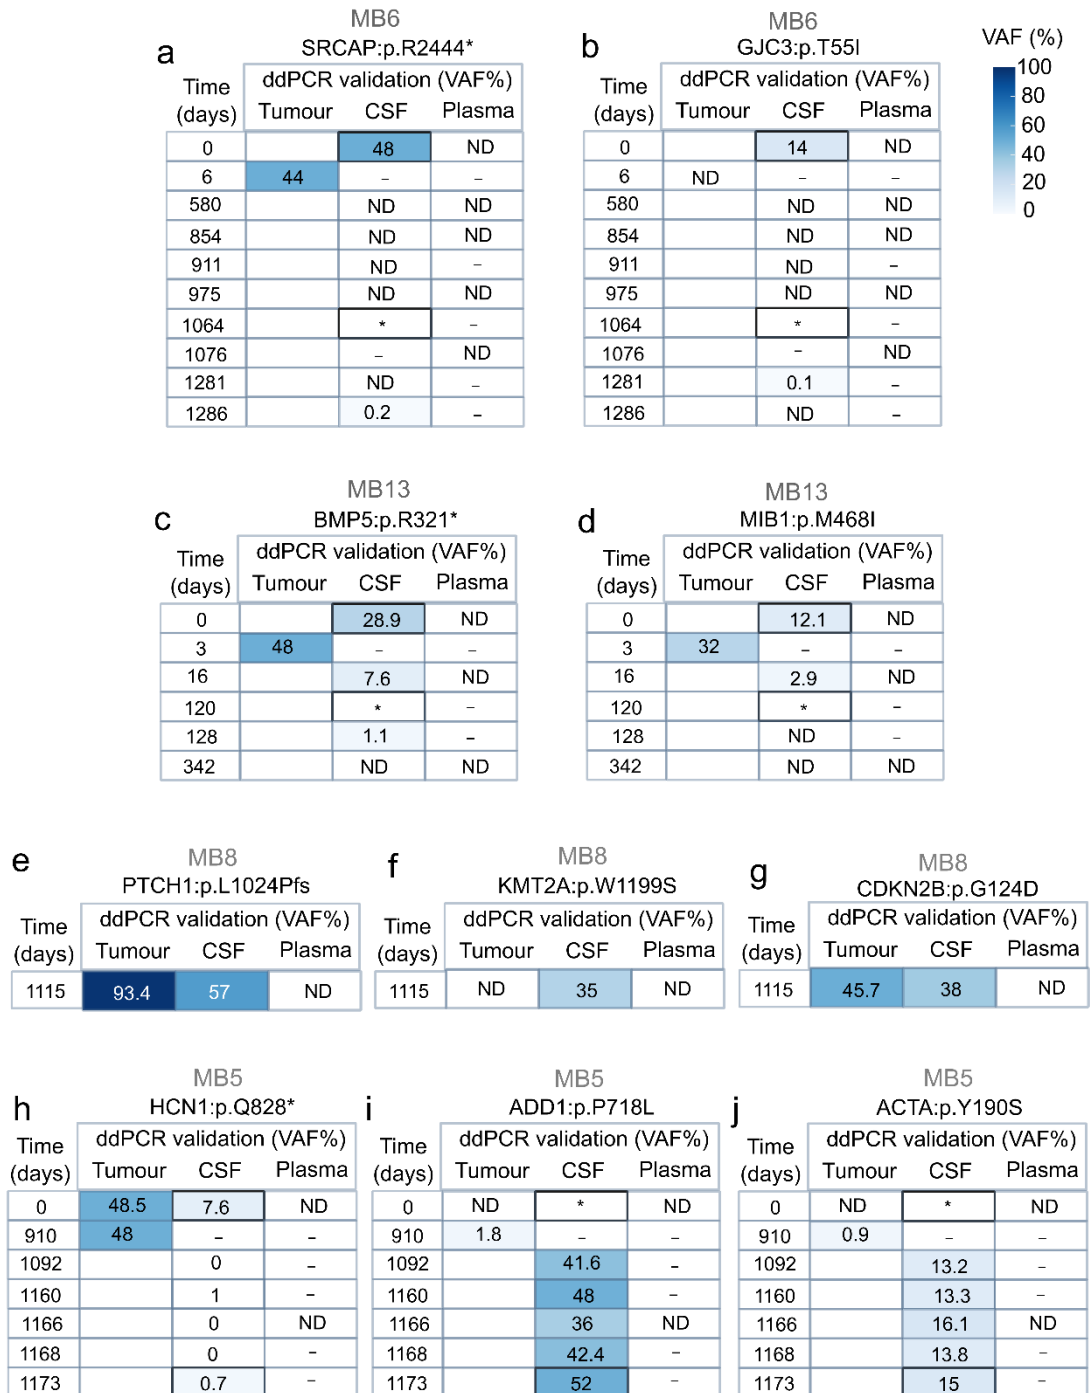

**Supplementary Figure 2** | Selected mutations identified from the WES analysis of 4 MB patients (MB5, MB6, MB8 and MB13) were validated using ddPCR in tumour/normal DNA, and follow-up CSF and plasma cfDNA samples. CSF ctDNA VAFs highlighted with a black box correspond to the samples used for WES (CSF1, CSF2). \* indicates that all CSF cfDNA was used for WES.

Supplementary Table 1 | Classification

| Schwalbe et al., 2017 |           |            |         |          |         |         | Hovestadt et al., 2020 |              |          |          |               |           |             |         |        |          |                 |             |           |  |
|-----------------------|-----------|------------|---------|----------|---------|---------|------------------------|--------------|----------|----------|---------------|-----------|-------------|---------|--------|----------|-----------------|-------------|-----------|--|
| Mutations             |           |            |         |          |         |         | Mutations              |              |          |          |               |           |             |         |        |          |                 |             |           |  |
| WNT                   | SHH-child | SHH-infant | Grp4-HR | Grp4-LR  | Grp3-LR | Grp3-HR | WNT                    | SHH          |          |          |               | Group3    |             |         | Group4 |          |                 |             |           |  |
|                       |           |            |         |          |         |         |                        | α            | β        | γ        | δ             | I         | II          | III     | IV     | V        | VI              | VII         | VIII      |  |
| TP53                  | TP53      | SUFU       |         |          |         | GFI1    | CTNNB1                 | TP53         | PTCH1    | PTCH1    | PTCH1         | GFI1 act  | GFI1 act    |         |        |          | PRDM6 act       | KBTBD4      | PRDM6 act |  |
| CTNNB1                | TP53 GL   | PTCH1      |         |          |         |         | DDX3X                  | PTCH1 (less) | KMT2D    | SMO      | TERT promoter | GFI1B act | GFI1B act   |         |        |          |                 |             | KDM6A     |  |
|                       | TERT      |            |         |          |         |         | SMARCA4                |              | SUFU     | BCOR     |               |           | KBTBD4      |         |        |          |                 |             | ZMYM3     |  |
|                       | SUFU      |            |         |          |         |         |                        |              |          |          |               |           | CTDNEP1     |         |        |          |                 |             | KMT2C     |  |
|                       | PTCH1     |            |         |          |         |         |                        |              |          |          |               |           | SMARCA4     |         |        |          |                 |             |           |  |
|                       |           |            |         |          |         |         |                        |              |          |          |               |           | KMT2D       |         |        |          |                 |             |           |  |
| Cytogenetics          |           |            |         |          |         |         | Cytogenetics           |              |          |          |               |           |             |         |        |          |                 |             |           |  |
| WNT                   | SHH-child | SHH-infant | Grp4-HR | Grp4-LR  | Grp3-LR | Grp3-HR | WNT                    | SHH          |          |          |               | Group3    |             |         | Group4 |          |                 |             |           |  |
|                       |           |            |         |          |         |         |                        | α            | β        | γ        | δ             | I         | II          | III     | IV     | V        | VI              | VII         | VIII      |  |
| 6-                    | 9p+       | 9q-        | i17q    | 17p+     | 7+      | 5+      | 6-                     | 9p+          | 2+       | 9q-      | 9q-           | OTX2 amp  | 8+          | 7+      | 14+    | 7+       | 7+              | 7+          | i17q      |  |
|                       | 17p-      |            |         | 7+       | 14+     | 8+      |                        | 9q-          | SUFU del | PTEN del | 14q-          |           | 1q+         | 10q-    | 7+     | 16q-     | 8-              | 8-          |           |  |
|                       | 9q-       |            |         | 18+      | 18+     | 13+     |                        | 10q-         | PTEN del |          |               |           | MYC amp     | MYC amp | 8-     | MYC amp  | 11-             | i17q (less) |           |  |
|                       | MYCN amp  |            |         | i17q     | 4-      | i17q    |                        | 17p-         |          |          |               |           | i17q (less) | i17q    | 10-    | MYCN amp | MYCN amp (less) |             |           |  |
|                       | GLI2 amp  |            |         | 8-       | 8-      | 16q-    |                        | MYCN amp     |          |          |               |           |             |         | 11-    | i17q     | i17q            |             |           |  |
|                       |           |            |         | 11-      | 10-     | MYC amp |                        | GLI2 amp     |          |          |               |           |             |         | 16-    |          |                 |             |           |  |
|                       |           |            |         | 16q-     | 11-     |         |                        |              |          |          |               |           |             |         |        |          |                 |             |           |  |
|                       |           |            |         | 11-      | 10-     |         |                        |              |          |          |               |           |             |         |        |          |                 |             |           |  |
|                       |           |            |         | 16q-     | 11-     |         |                        |              |          |          |               |           |             |         |        |          |                 |             |           |  |
|                       |           |            |         | MYCN amp | 13-     |         |                        |              |          |          |               |           |             |         |        |          |                 |             |           |  |
|                       |           |            |         |          | 15-     |         |                        |              |          |          |               |           |             |         |        |          |                 |             |           |  |
|                       |           |            |         |          | 16-     |         |                        |              |          |          |               |           |             |         |        |          |                 |             |           |  |
|                       |           |            |         |          | 21-     |         |                        |              |          |          |               |           |             |         |        |          |                 |             |           |  |

| PATIENT_ID | Schwalbe et al., 2017 |                                                  |            |         |                    |         |         | Hovestadt et al., 2020 |                                                  |                              |                             |      |         |         |         |         |                  |               |     |      |   |
|------------|-----------------------|--------------------------------------------------|------------|---------|--------------------|---------|---------|------------------------|--------------------------------------------------|------------------------------|-----------------------------|------|---------|---------|---------|---------|------------------|---------------|-----|------|---|
|            | WNT                   | SHH-chiId                                        | SHH-infant | Grp4-HR | Grp4-LR            | Grp3-LR | Grp3-HR | WNT                    | SHH                                              |                              |                             |      | Group3  |         |         |         | Group4           |               |     |      |   |
|            |                       |                                                  |            |         |                    |         |         |                        | α                                                | β                            | γ                           | δ    | I       | II      | III     | IV      | V                | VI            | VII | VIII |   |
| MB1        | -                     | -                                                | -          | -       | -                  | -       | -       | -                      | -                                                | -                            | -                           | -    | -       | -       | -       | -       | -                | -             | -   | -    | - |
| MB2        | -                     | -                                                | -          | -       | 7+                 | 7+      | -       | -                      | -                                                | -                            | -                           | -    | 7+      | 7+      | 7+      | 7+      | 7+               | 7+            | 7+  | -    | - |
| MB3        | -                     | -                                                | -          | -       | -                  | -       | MYC amp | -                      | -                                                | -                            | -                           | -    | MYC amp | MYC amp | -       | MYC amp | -                | -             | -   | -    | - |
| MB4        | -                     | -                                                | -          | -       | 7+;16q-            | 7+      | -       | -                      | -                                                | -                            | -                           | -    | 7+      | 7+      | 7+;16q- | 7+      | 7+               | 7+            | 7+  | -    | - |
| MB5        | -                     | TP53 GL;<br>MYCN amp;<br>GLI2 amp;<br>17p-       | -          | -       | MYCNamp;<br>16q;7+ | 7+      | -       | -                      | TP53 GL;<br>MYCN amp;<br>GLI2 amp;<br>17p;10q-   | SUFUdel;<br>2+               | -                           | -    | -       | -       | 7+;10q- | 7+      | MYCNamp;<br>16q- | (MYCNamp); 7+ | 7+  | -    | - |
| MB6        | -                     | 17p-                                             | -          | -       | -                  | -       | -       | -                      | 17p-                                             | -                            | -                           | -    | -       | -       | -       | -       | -                | -             | -   | -    | - |
| MB7        | -                     | 17p-                                             | -          | -       | 7+;11-             | 7+;11-  | -       | -                      | 17p-                                             | -                            | -                           | -    | -       | -       | 7+;11-  | 7+      | 7+;11-           | -             | -   | -    | - |
| MB8        | -                     | PTCH1;<br>TP53;<br>MYCNamp;<br>17p;9q-           | -          | -       | 8-                 | 8-      | -       | -                      | PTCH1;<br>TP53;<br>MYCNamp;<br>17p;9q-           | PTCH1                        | 9q-                         | -    | -       | -       | 8-      | -       | 8-               | 8-            | 8-  | -    | - |
| MB9        | CTNNB1;<br>6-         | 17p-                                             | -          | -       | -                  | -       | -       | CTNNB1; 6-             | 17p-                                             | -                            | -                           | -    | -       | -       | -       | -       | -                | -             | -   | -    | - |
| MB10       | -                     | -                                                | -          | -       | -                  | -       | -       | -                      | -                                                | -                            | -                           | -    | -       | -       | -       | -       | -                | -             | -   | -    | - |
| MB11       | -                     | 17p-                                             | -          | -       | -                  | -       | -       | -                      | 17p-                                             | -                            | -                           | -    | -       | -       | -       | -       | -                | -             | -   | -    | - |
| MB12       | -                     | PTCH1;<br>MYCN amp;<br>GLI2 amp                  | -          | -       | -                  | -       | -       | -                      | PTCH1;<br>MYCN amp;<br>GLI2 amp;<br>10q-         | PTCH1;<br>KMT2D;<br>PTEN del | PTCH1;<br>BCOR;<br>PTEN del | -    | -       | 10q-    | -       | -       | -                | -             | -   | -    | - |
| MB13       | -                     | TP53 GL;<br>GLI2 amp                             | -          | -       | 11-                | 10-;11- | -       | -                      | TP53 GL;<br>GLI2 amp                             | -                            | -                           | 14q- | -       | -       | -       | 10-;11- | -                | 11-           | -   | -    | - |
| MB5CSF     | -                     | TP53 GL;<br>MYCN amp;<br>GLI2 amp;<br>17p- (33%) | -          | -       | MYCNamp            | 7+      | -       | -                      | TP53 GL;<br>MYCN amp;<br>GLI2 amp;<br>17p- (33%) | -                            | -                           | -    | -       | -       | -       | MYCNamp | (MYCNamp)        | -             | -   | -    | - |
| MB6CSF     | -                     | 17p-                                             | -          | -       | -                  | -       | -       | -                      | 17p-                                             | -                            | -                           | -    | -       | -       | -       | -       | -                | -             | -   | -    | - |
| MB8CSF     | -                     | PTCH1;<br>TP53;<br>MYCNamp;<br>17p;9q-           | -          | -       | 8-                 | 8-      | -       | -                      | PTCH1;<br>TP53;<br>MYCNamp;<br>17p;9q-           | PTCH1                        | 9q-                         | -    | OTX2amp | -       | 8-      | -       | 8-               | 8-            | 8-  | -    | - |
| MB13CSF    | -                     | TP53 GL;<br>GLI2 amp                             | -          | -       | 11-                | 10-;11- | -       | -                      | TP53 GL;<br>GLI2 amp                             | -                            | -                           | 14q- | -       | -       | -       | 10-;11- | -                | 11-           | -   | -    | - |

**Supplementary Table 2.** Patient monitoring and ctDNA dynamics for 9 MB patients

| PATIENT_ID | MUTATION       | TIME (Days) | TUMOUR_VAF (%) | PLASMA_VAF (%) | CSF_VAF (%) |
|------------|----------------|-------------|----------------|----------------|-------------|
| MB1        | RIOK2:p.S456L  | 0           | -              | ND             | 7           |
|            |                | 6           | 47             | -              | -           |
|            |                | 487         | -              | -              | ND          |
| MB2        | PUS7:p.D535A   | 0           | 15,9           | ND             | 3,3         |
|            |                | 1431        | -              | ND             | ND          |
| MB3        | TRRAP:p.E3107K | 0           | 63             | ND             | 11,9        |
|            |                | 1414        | -              | ND             | ND          |
| MB4        | XRCC5:p.K35N   | 0           | 50             | ND             | 0,38        |
|            |                | 527         | -              | -              | ND          |
|            |                | 1347        | -              | ND             | ND          |
| MB7        | YY1AP1:p.R665* | 0           | 29             | ND             | 0,18        |
|            |                | 744         | -              | ND             | ND          |
| MB9        | CTNNB1:p.S37C  | 0           | 47,2           | 2,2            | ND          |
|            |                | 525         | -              | ND             | ND          |
| MB10       | HSPG2:p.R3992H | 0           | 45             | ND             | ND          |
|            |                | 476         | -              | -              | ND          |
| MB11       | NFIA:p.R322H   | 0           | 15,5           | ND             | 9           |
|            |                | 394         | ND             | ND             | ND          |
| MB12       | BCOR:p.E518*   | 0 (biopsy)  | 97,9           | -              | -           |
|            |                | 240         | -              | ND             | ND          |
|            |                | 652         | -              | -              | ND          |
