# Supplementary material for: Circulating tumour DNA from the cerebrospinal fluid allows the characterisation and monitoring of medulloblastoma
Source: PubMed Central journal article supplement (PMC7591522; doi:10.1038/s41467-020-19175-0), 2020-10-27
Supplement: 41467_2020_19175_MOESM3_ESM.pdf [file 41467_2020_19175_MOESM3_ESM.pdf]

## **Description of Additional Supplementary Files**

File Name: Supplementary Data 1

Description: Alignment information from the WES

File Name: Supplementary Data 2

Description: Germline mutations

File Name: Supplementary Data 3

Description: List of mutations identified T/N

File Name: Supplementary Data 4

Description: List of mutations MB5 T/N/CSF0/CSF1173

File Name: Supplementary Data 5

Description: List of mutations MB6 T/N/CSF0/CSF1064

File Name: Supplementary Data 6

Description: List of mutations MB8 T/N/CSF1115

File Name: Supplementary Data 7

Description: List of mutations MB13 T/N/CSF0/CSF120
